# Supplementary material for: Mucin Transiently Sustains Coronavirus Infectivity through Heterogenous Changes in Phase Morphology of Evaporating Aerosol
Source: MDPI journal article supplement (doi:10.3390/v14091856), 2022-08-24
Supplement: s1 [file s1]

## Supplementary Materials

**Table S1.** Measurements from Figure 2. MHV is an appropriate surrogate for SARS-CoV-2

|                                        | RH % | pH   | Time<br>(seconds) | N  | Infectivity<br>(%) |
|----------------------------------------|------|------|-------------------|----|--------------------|
| Figure 2a<br>Aerosol phase infectivity | 90   |      | 30                | 6  | M=86.50, SD=41.85  |
|                                        | 90   |      | 120               | 10 | M=68.79, SD=34     |
|                                        | 90   |      | 300               | 10 | M=67.02, SD=11.84  |
| Figure 2b<br>Aerosol phase infectivity | 40   |      | 30                | 11 | M=42.78, SD=15.54  |
|                                        | 40   |      | 120               | 6  | M=41.70, SD=15.36  |
|                                        | 40   |      | 300               | 7  | M=38.64, SD=14.64  |
| Figure 2c<br>Bulk liquid infectivity   |      | 7.5  | 15                | 15 | M=100, SD=13.83    |
|                                        |      | 7.5  | 600               | 12 | M=117.01, SD=41.74 |
|                                        |      | 8.0  | 15                | 4  | M=100, SD=47.75    |
|                                        |      | 8.0  | 600               | 4  | M=91.96, SD=11.60  |
|                                        |      | 8.5  | 15                | 11 | M=100, SD=13.62    |
|                                        |      | 8.5  | 600               | 15 | M=83.04, SD=23.81  |
|                                        |      | 9.5  | 15                | 12 | M=100, SD=39.04    |
|                                        |      | 9.5  | 600               | 8  | M=67.35, SD=23.81  |
|                                        |      | 10.0 | 15                | 15 | M=100, SD=29.47    |
|                                        |      | 10.0 | 600               | 11 | M=40.11, SD=15.63  |
| Figure 2d<br>Bulk liquid infectivity   |      | 8.5  | 15                | 14 | M=100, SD=13.84    |
|                                        |      | 8.5  | 120               | 9  | M=80.95, SD=11.85  |
|                                        |      | 8.5  | 300               | 12 | M=82.00, SD=15.18  |
|                                        |      | 8.5  | 600               | 15 | M=83.04, SD=22.38  |
|                                        |      | 9.5  | 15                | 14 | M=100, SD=35.9     |
|                                        |      | 9.5  | 120               | 9  | M=86.72, SD=18.32  |
|                                        |      | 9.5  | 300               | 12 | M=73.17, SD=23.1   |
|                                        |      | 9.5  | 600               | 8  | M=67.35, SD=8.42   |
|                                        |      | 10.0 | 15                | 15 | M=100, SD=29.47    |
|                                        |      | 10.0 | 120               | 3  | M=61.35, SD=5.24   |
|                                        |      | 10.0 | 300               | 12 | M=34.99, SD=15.66  |
|                                        |      | 10.0 | 600               | 11 | M=40.11, SD=15.63  |

**Table S2.** Measurements from Figure 3. Comparing MHV infectivity in two droplet sizes.

|                                           | Initial droplet radius<br>( $\mu\text{m}$ ) | Time<br>(seconds) | N  | Infectivity %        |
|-------------------------------------------|---------------------------------------------|-------------------|----|----------------------|
| Figure 3b<br>Aerosol phase<br>infectivity | 25 $\pm$ 1                                  | 30                | 6  | M=52.65, SD=17.7     |
|                                           |                                             | 120               | 3  | M=39.14,<br>SD=3.59  |
|                                           |                                             | 300               | 6  | M=46.58,<br>SD=6.23  |
|                                           | 31 $\pm$ 1                                  | 30                | 11 | M=42.79,<br>SD=15.54 |
|                                           |                                             | 120               | 6  | M=41.77,<br>SD=15.37 |
|                                           |                                             | 300               | 7  | M=38.64,<br>SD=14.64 |

**Table S3.** Measurements from Figure 4. Effect of mucin on airborne MHV infectivity with two tailed t-test

|                                             | Time<br>(seconds) | Mucin concentration<br>w/v (%) | N  | Infectivity %                      | <i>t</i>  | <i>p</i> |
|---------------------------------------------|-------------------|--------------------------------|----|------------------------------------|-----------|----------|
| Figure 4a<br>Aerosol phase<br>infectivity   | 30                | 0                              | 11 | <i>M</i> = 42.78 <i>SD</i> = 15.54 |           |          |
|                                             |                   | 0.1                            | 13 | <i>M</i> = 64.79 <i>SD</i> = 20.50 | 19 = 2.42 | .02      |
|                                             |                   | 0.3                            | 6  | <i>M</i> = 57.11 <i>SD</i> = 9.44  | 15 = 2.04 | .05      |
|                                             |                   | 0.5                            | 5  | <i>M</i> = 77.37 <i>SD</i> = 19.88 | 15 = 3.98 | .001     |
| Figure 4b<br>Aerosol phase in-<br>fectivity | 120               | 0                              | 6  | <i>M</i> = 41.70 <i>SD</i> = 15.39 |           |          |
|                                             |                   | 0.1                            | 6  | <i>M</i> = 55.31 <i>SD</i> = 20.79 | 11 = 1.31 | .21      |
|                                             |                   | 0.3                            | 11 | <i>M</i> = 58.22 <i>SD</i> = 13.63 | 10 = 1.96 | .07      |
|                                             |                   | 0.5                            | 7  | <i>M</i> = 68.03 <i>SD</i> = 27.76 | 15 = 2.14 | .05      |
| Figure 4c<br>Aerosol phase in-<br>fectivity | 300               | 0                              | 7  | <i>M</i> = 38.64 <i>SD</i> = 14.64 |           |          |
|                                             |                   | 0.1                            | 9  | <i>M</i> = 46.65 <i>SD</i> = 16.68 | 13 = 0.98 | .34      |
|                                             |                   | 0.3                            | 8  | <i>M</i> = 36.75 <i>SD</i> = 19.50 | 10 = 0.19 | .85      |
|                                             |                   | 0.5                            | 8  | <i>M</i> = 45.16 <i>SD</i> = 15.92 | 12 = 0.79 | .44      |

**Table S4.** Standardised distribution of T=0 measurements

| Standardised distribution of T=0 descriptive statistics |                    |         |
|---------------------------------------------------------|--------------------|---------|
|                                                         | Mean               | 100.82  |
|                                                         | Standard Error     | 3.58    |
|                                                         | Median             | 101.37  |
|                                                         | Mode               | 119.04  |
|                                                         | Standard Deviation | 27.93   |
|                                                         | Sample Variance    | 780.10  |
|                                                         | Kurtosis           | -0.41   |
|                                                         | Skewness           | -0.18   |
|                                                         | Range              | 127.20  |
|                                                         | Minimum            | 32.05   |
|                                                         | Maximum            | 159.25  |
|                                                         | Sum                | 6150.15 |
|                                                         | Count              | 61      |

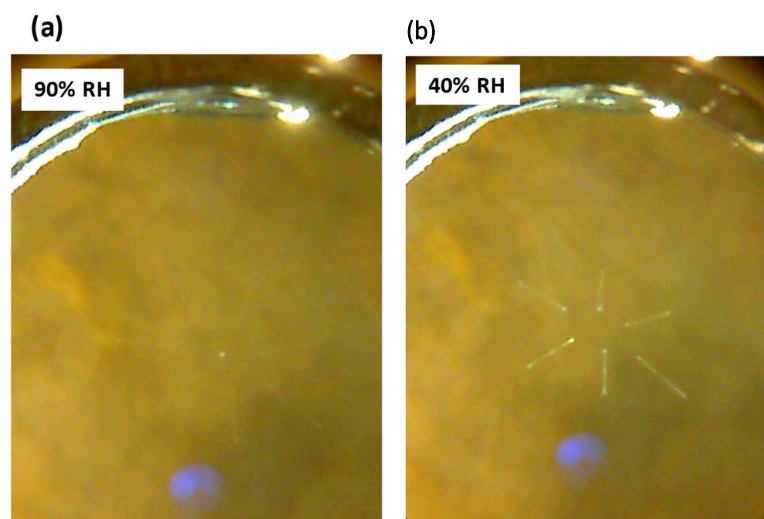

**Figure S1.** Qualitative evidence for efflorescence. A planar view of the CELEBS chamber, visualising levitated aerosols after 30 seconds. (a) RH 90% (b) RH 40%. Aerosol particles appeared to reflect the light at a higher intensity at 40% RH, appearing brighter in chamber view, when compared with equilibrated droplets levitating at 90% RH. This is indicative of the aerosol particles at 40% RH containing a solid crystalline component and scattering the light irregularly with more intensity than the liquid bioaerosol at 90% RH.

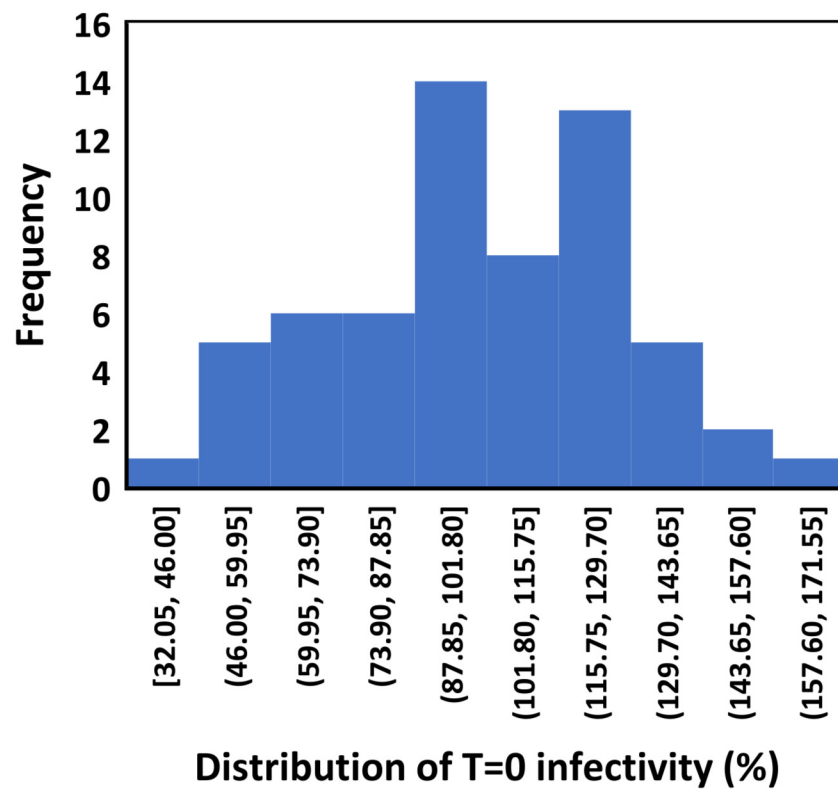

**Figure S2.** Standardised distribution of T=0. Levitations (5 seconds) at 90% RH were shown to result in no observable loss of infectivity compared with the initial viral titre measured through TCID<sub>50</sub>. The data from each separate measurement requires standardisation to an average of the initial viral load carried by a droplet at the beginning of the levitation, referred to as the T=0 measurement from that day.

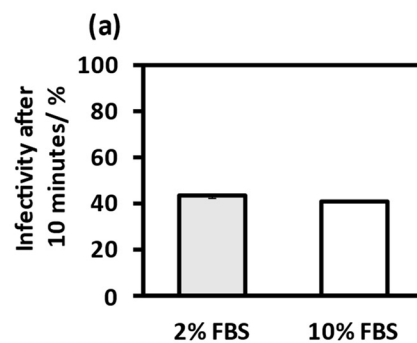

**Figure S3.** Bulk liquid viral infectivity at high pH, comparing two concentrations of FBS. Mean viral infectivity in bulk phase after 10 minutes at pH 9.8.

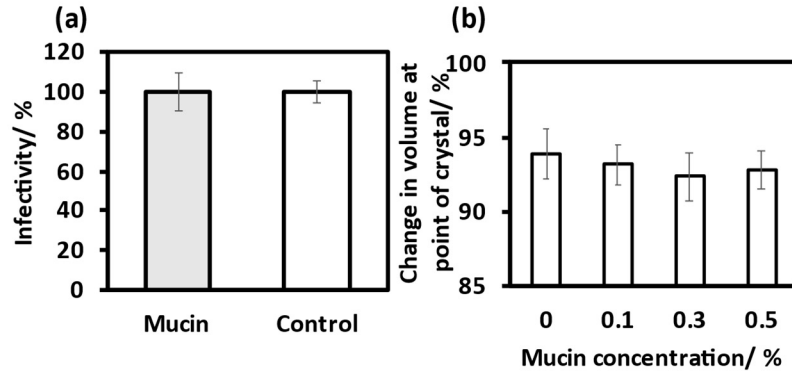

**Figure S4.** Effect of mucin on bulk phase infectivity and evaporation kinetics. (a) Mean infectivity of virus in bulk phase with 0.5% w/v mucin, and 0% w/v mucin control, error bars show standard error. (B) Percentage change in volume of evaporating droplet with mucin concentration, measured using CK-EDB, error bars show standard deviation (N=100).

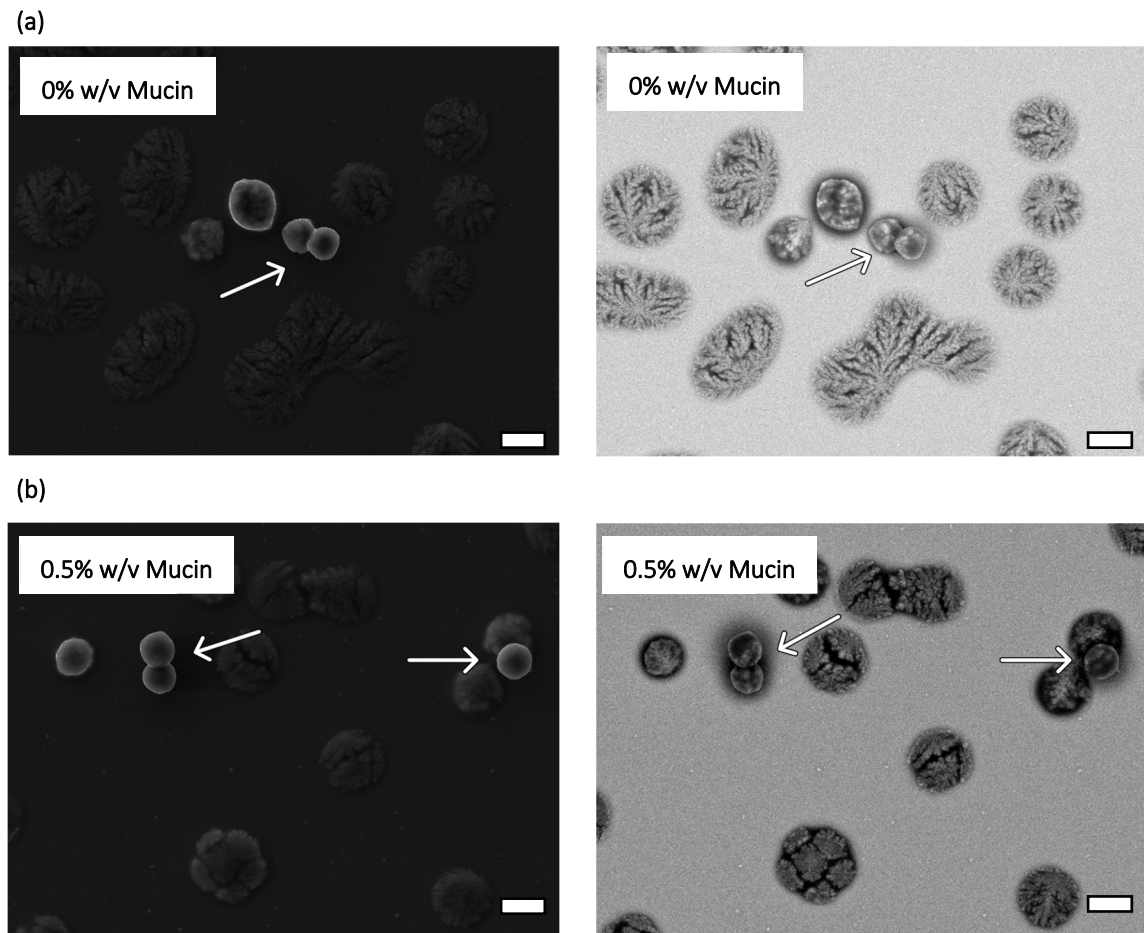

**Figure S5.** SEM micrographs of particles collected from the bottom of FDC. Droplets dried at 40% RH. Magnification x1000, scale bar 5  $\mu$ m. Particles indicated by white arrows. SED images show topographical structure, left column. BED-C images show internal phase separation, right column (a) DMEM 10% FBS 0% mucin (b) DMEM, 10% FBS, 0.5% w/v mucin.
